# Supplementary material for: Reliability of kettlebell swing one and five repetition maximum
Source: PeerJ. 2022 Nov 21;10:e14370. doi: 10.7717/peerj.14370 (PMC9686413; doi:10.7717/peerj.14370)
Supplement: Supplemental Information 1 [file peerj-10-14370-s001.xls]

## Sheet: consecutive pairwise 5RM
	CONSECUTIVE PAIRWISE ANALYSIS OF TRIALS FOR RELIABILITY
	Hover cursor for citation:
	Hover cursor for updates:		2019	2018	2015	2012	2010	2009
	This spreadsheet calculates reliability statistics for consecutive pairs of trials and for the means of these statistics when there are >2 trials.
	For trials spaced at equal intervals, these means are better estimates of test-retest reliability than the more usual ANOVA-based reliablity statistics.
	But see the 1-way and 2-way spreadsheets in this workbook for such analyses.
	The reliability statistics are calculated for raw data and after log transformation.
	See the instructions in dark red to help you decide between which is better for your data.
	The data shown here are what you would expect for countermovement-jump height (best of three jumps) of team-sport athletes in trials separated by only a day or two.
	I generated the data by putting appropriate means and SD into the 2-way spreadsheet.
	Delete and replace the numbers in blue. Stats you might want are in red. Don't change any cells with a colored background.
	Missing values must be blanks or the graphs will display incorrectly. (The X values will plot as consecutive integers.)
	Clear all the "delete" and #NUM! corresponding to missing values. Restore the formula (by copying an adjacent cell) if you restore a missing value or for new data.
	Check the graphs (especially of the change scores) for outliers and non-uniformity of scatter. The log-transformed variables may show less non-uniformity.
	For more than 20 subjects, COPY any number of rows after the first data row and INSERT in the same place without deselecting.
	Do NOT copy and insert the first data row.											Use analysis of RAW data in one or more of the following situations:										Use LOG transformation in one or more of the following situations:
	Double-click on any of the red mean or SD cells to check that you have done this operation properly.											the data can be zero or negative;										the data can only be positive and non-zero;
	Colored boxes should enclose all rows of your data.											the data were measured from an arbitrary reference value;										the between-subject SD or change-score SD is more than ~20% of the mean;
	For less than 20 subjects, delete or clear any unwanted or empty rows.											the magnitude of the error is expected to be similar for all subjects.										the magnitude of the percent or factor error is expected to be similar for all subjects.
	To remove a trial, clear its data, or set the corrresponding "Include which trials?" cell to 0 or blank.
	For more than 6 trials, copy and insert the entire column(s) for Trials 5 and/or 6 and their change scores for the RAW and the LOG data.											Missing values produce delete in the panel of change scores.										Missing values produce #NUM! in the panel of log-transformed data.							Missing values produce delete in the panel of change scores.
	And follow the instructions in the cells indicated by "Hover cursor for >6 trials". If such editing is too difficult for you, contact me.											Clear delete from these cells to stop them plotting as zeros.										Clear #NUM! from these cells to get complete analyses.							Clear delete from these cells to stop them plotting as zeros.
												Copy-paste or drag a corner to restore formulae to those cells if you enter new data.										Copy-paste or drag a corner to restore formulae to those cells if you enter new data.							Copy-paste or -drag to restore formulae to those cells if you enter new data.
		Choose smallest effect:	0.2
		Choose conf. limits (%):	90			Hover cursor for >6 trials:	Read	me				Hover cursor for >6 trials:	Read me	Read	me	Do not							Hover cursor for >6 trials:	Read me	Read	me	Do not			Hover cursor for >6 trials:	Read me	Read	me	Do not
		RAW Data									Change scores of raw data					modify	Any				100*LOG-Transformed Data						modify		Change scores of Log-transformed data					modify	Any
		Trial:	1	2	3	4	5	6	Mean		2-1	3-2	4-3	5-4	6-5	this col.	subject?				1	2	3	4	5	6	this col.		2-1	3-2	4-3	5-4	6-5	this col.	subject?
		1	76.2273	78.633	81.2232						2.4057	2.59017					1			1	433.372	436.479	439.72	#NUM!	#NUM!	#NUM!			3.10717	3.24092					#NUM!
		2	90.9987	91.0971	90.9537						0.0984003	-0.143395					1			2	451.085	451.193	451.035	#NUM!	#NUM!	#NUM!			0.108075	-0.157533					#NUM!
		3	63.4708	71.1038	68.6018						7.63293	-2.50192					1			3	415.058	426.414	422.832	#NUM!	#NUM!	#NUM!			11.356	-3.58209					#NUM!
		4	65.8751	70.9297	71.1247						5.05469	0.194904					1			4	418.776	426.169	426.443	#NUM!	#NUM!	#NUM!			7.393	0.274408					#NUM!
		5	76.1382	78.628	76.4174						2.48984	-2.21063					1			5	433.255	436.473	433.621	#NUM!	#NUM!	#NUM!			3.21783	-2.85179					#NUM!
		6	55.952	63.8293	66.2797						7.87733	2.45037					1			6	402.449	415.621	419.388	#NUM!	#NUM!	#NUM!			13.1719	3.76708					#NUM!
		7	53.6169	56.1023	58.6349						2.48538	2.53257					1			7	398.187	402.718	407.133	#NUM!	#NUM!	#NUM!			4.5312	4.41528					#NUM!
		8	65.5	68.8828	66.2521						3.38279	-2.63066					1			8	418.205	423.241	419.347	#NUM!	#NUM!	#NUM!			5.03562	-3.89387					#NUM!
		9	66.2948	68.7202	72.2975						2.42537	3.57729					1			9	419.411	423.004	428.079	#NUM!	#NUM!	#NUM!			3.59312	5.07463					#NUM!
		10	83.6771	88.7016	88.6769						5.02453	-0.0246855					1			10	442.696	448.528	448.5	#NUM!	#NUM!	#NUM!			5.8313	-0.0278337					#NUM!
		11	66.2331	71.327	71.2673						5.09392	-0.0596886					1			11	419.318	426.727	426.644	#NUM!	#NUM!	#NUM!			7.40949	-0.0837182					#NUM!
		12	73.8109	76.291	76.3574						2.48009	0.0664003					1			12	430.151	433.456	433.543	#NUM!	#NUM!	#NUM!			3.30484	0.0869976					#NUM!
		13	73.8109	76.291	73.8226						2.48009	-2.46839					1			13	430.151	433.456	430.167	#NUM!	#NUM!	#NUM!			3.30484	-3.28899					#NUM!
		14	48.6786	51.2731	51.119						2.59459	-0.154165					1			14	388.524	393.717	393.416	#NUM!	#NUM!	#NUM!			5.19285	-0.301128					#NUM!
		15	71.3582	76.3373	76.3126						4.97915	-0.0247578					1			15	426.771	433.516	433.484	#NUM!	#NUM!	#NUM!			6.74502	-0.0324374					#NUM!
		16	63.7198	66.053	63.5586						2.33314	-2.4944					1			16	415.45	419.046	415.196	#NUM!	#NUM!	#NUM!			3.59611	-3.84952					#NUM!
		17	61.0779	63.5737	66.1021						2.49575	2.52844					1			17	411.215	415.22	419.12	#NUM!	#NUM!	#NUM!			4.0049	3.90013					#NUM!
		18	66.0984	66.083	66.0584						-0.0154462	-0.0245529					1			18	419.114	419.091	419.054	#NUM!	#NUM!	#NUM!			-0.0233712	-0.0371616					#NUM!
		19	58.5393	61.0605	58.5587						2.52128	-2.50188					1			19	406.97	411.187	407.003	#NUM!	#NUM!	#NUM!			4.21681	-4.18369					#NUM!
		20	68.6225	68.5767	68.5691						-0.0457632	-0.00762005					1			20	422.862	422.795	422.784	#NUM!	#NUM!	#NUM!			-0.0667106	-0.0111123					#NUM!
		Mean	67.485	70.6747	70.6094				69.5897	Mean of change	3.18969	-0.0653301				Mean	20			Mean	420.151	424.902	424.825				423.293	Mean	4.7515	-0.0770717					0
	1.95971	SD	10.0119	9.7247	9.65538				9.79855	SD of change	2.18767	1.98634				2.08943				SD	14.8121	13.8726	13.7385				14.1491	SD	3.35893	2.9425				#DIV/0!
		Total no. of subjects	20	20	20	0	0	0	20	Total no. of subjects	20	20	0	0	0	20				N	20	20	20	0	0	0		N	20	20	0	0	0
		Include which trials?	1	1	1	1	0	0												Include which trials?	1	1	1	1	0	0
		DF	19	19	19	0	0	0	19											DF	19	19	19	0	0	0	Mean	Factor change in mean	1.04866	0.99923				Mean
																				Back-transformed mean	66.7871	70.0371	69.9831				68.9188	SD of change as a factor	1.03416	1.02986
																				SD as a ×/÷ factor	1.15965	1.14881	1.14727				1.15199	Change in mean (%)	4.86619	-0.077042
	For your data, you may have to set max and min values of X and Y axes to appropriate values.																			SD as a CV (%)	15.9653	14.881	14.727				15.199	SD of change as CV (%)	3.41598	2.98622
									Measures of reliability via the RAW variable											Total no. of subjects	20	20	20	0	0	0		Total no. of subjects	20	20	0	0	0
									Raw	Trials	2-1	3-2	4-3	5-4	6-5	Mean											Measures of reliability via the LOG-TRANSFORMED variable
										Change in mean	3.18969	-0.0653301							Clear #NUM! and "delete" from the log-transformed cells to stop them plotting as zeros.								Factors	Trials	2-1	3-2	4-3	5-4	6-5	Mean
										Lower conf. limit	2.34383	-0.83334							Restore the log-transformation formula to those cells if you enter new data.									Factor change in mean	1.04866	0.99923
										Upper conf. limit	4.03554	0.70268																Lower conf. limit	1.03513	0.987926
										Conf. limits as ±value	0.845852	0.76801																Upper conf. limit	1.06237	1.01066
										Typical error	1.54691	1.40455				1.47745												Conf. limits as ×/÷factor	1.01307	1.01144
										Lower conf. limit	1.22813	1.11511				1.23301												Factor typical error	1.02404	1.02102
										Upper conf. limit	2.11991	1.92482				1.91145												Lower conf. limit	1.01904	1.01666
										Conf. limits as approx. ×/÷factor	1.31382	1.31382				1.24508												Upper conf. limit	1.03308	1.02892
										Bias correction factor	1.01316	1.01316				1.00843												Conf. limits as approx. ×/÷factor	1.00687	1.00602
										Smallest effect from pure SD	1.94947	1.91755				1.93731												Bias correction factor	1.00031	1.00027
										Lower conf. limit	1.31219	1.29347				1.3053												Smallest effect from pure SD	1.02871	1.02767
										Upper conf. limit	2.42468	2.38348				2.40884												Lower conf. limit	1.0192	1.01856
										Smallest effect from observed SD	1.97387	1.93802				1.95971												Upper conf. limit	1.03585	1.03452
										Lower conf. limit	1.56711	1.53864				1.55586												Smallest effect from observed SD	1.02912	1.028				1.0287
										Upper conf. limit	2.70501	2.65588				2.68561												Lower conf. limit	1.02305	1.02216
										Degrees of freedom	19	19	0	0	0	29.64												Upper conf. limit	1.04011	1.03856
									Standardized (when ICC>0)																			Degrees of freedom	19	19	0	0	0
										Change in mean	0.327236	-0.0068139															Percents
										Lower conf. limit	0.240458	-0.086917																Change in mean (%)	4.86619	-0.077042
										Upper conf. limit	0.414013	0.0732892																Lower conf. limit	3.51308	-1.20743
										Conf. limits as ±value	0.0867774	0.0801031																Upper conf. limit	6.23699	1.06628
										Typical error	0.158701	0.146494				0.150782												Conf. limits as approx. ±value	1.36195	1.13685
										Lower conf. limit	0.125996	0.116306				0.125836												Typical error as a CV (%)	2.40355	2.10246
										Upper conf. limit	0.217485	0.200757				0.195075												Lower conf. limit	1.90356	1.66561
										Conf. limits as approx. ×/÷factor	1.31382	1.31382				1.24508												Upper conf. limit	3.30844	2.8924
										Bias correction factor	1.01316	1.01316				1.00843												Conf. limits as approx. ×/÷factor	1.31834	1.31778
									Correlations																			Bias correction factor	1.01332	1.0133
										Pearson correlation	0.977216	0.980211				0.978766												Smallest effect from pure SD	2.87086	2.7672
										Lower conf. limit	0.950095	0.956577																Lower conf. limit	1.9201	1.85637
										Upper conf. limit	0.989676	0.991041																Upper conf. limit	3.58489	3.45211
										Bias correction factor	1.0014	1.00122																Smallest effect from observed SD	2.91159	2.79962				2.87025
										Intraclass correlation (ICC)	0.978217	0.981385				0.979849												Lower conf. limit	2.30473	2.21635
										Lower conf. limit	0.953363	0.960071				0.961												Upper conf. limit	4.01146	3.8564
										Upper conf. limit	0.989895	0.991371				0.990237											Standardized (when ICC>0)
										Effective no. of trials	2	2				2.56												Change in mean	0.335745	-0.00564709
										F	90.8168	106.438				125.48												Lower conf. limit	0.243976	-0.0890074
										Numerator DF	19	19				19												Upper conf. limit	0.427513	0.0777132
										Denominator DF	19	19	0	0	0	29.64												Conf. limits as ±value	0.0917683	0.0833603
										F lower	41.8848	49.0895				64.0811												Typical error	0.167828	0.152451
										F upper	196.914	230.785				260.649												Lower conf. limit	0.133243	0.121035
										Fisher r	2.23169	2.30292				2.26731												Upper conf. limit	0.229993	0.208921
										Fisher SE^-2	17	17																Conf. limits as approx. ×/÷factor	1.31382	1.31382
										Pure variance	95.0113	91.9254				93.8288												Bias correction factor	1.01316	1.01316
										SE of pure variance	31.5926	30.4579				31.1477											Correlations
										LCL	43.0461	41.8267				42.5954												Pearson correlation	0.976127	0.978621
										UCL	146.976	142.024				145.062												Lower conf. limit	0.947743	0.953133
																												Upper conf. limit	0.989179	0.990316
																												Bias correction factor	1.00147	1.00132
																												Intraclass correlation	0.975697	0.979868
																												Lower conf. limit	0.948043	0.956857
																												Upper conf. limit	0.988718	0.990665
																											Measures of reliability of log-transformed variable
																													2-1	3-2	4-3	5-4	6-5	Mean
																												Change in mean	4.7515	-0.0770717
																												Lower conf. limit	3.45278	-1.21478
																												Upper conf. limit	6.05021	1.06063
																												Typical error	2.37512	2.08066				#DIV/0!
																												Lower conf. limit	1.88567	1.65189				#DIV/0!
																												Upper conf. limit	3.25489	2.85136				#DIV/0!
																												Bias correction factor	1.01316	1.01316
																												Smallest effect from pure SD	2.83042	2.72961				#DIV/0!
																												Lower conf. limit	1.9019	1.83935				#DIV/0!
																												Upper conf. limit	3.52213	3.39386				#DIV/0!
																												Smallest effect from observed SD	2.87001	2.76115				2.82983
																												Lower conf. limit	2.27857	2.19214				#DIV/0!
																												Upper conf. limit	3.93309	3.7839				#DIV/0!
																												DF	19	19	0	0	0	#DIV/0!
																												Stdized change in mean	0.335745	-0.00564709
																												Lower conf. limit	0.243976	-0.0890074
																												Upper conf. limit	0.427513	0.0777132
																												Stdized typical error	0.167828	0.152451
																												Lower conf. limit	0.133243	0.121035
																												Upper conf. limit	0.229993	0.208921
																												Pearson r	0.976127	0.978621				0.977408
																												Lower conf. limit	0.947743	0.953133
																												Upper conf. limit	0.989179	0.990316
																												Bias correction factor	1.00147	1.00132
																												Intraclass r	0.975697	0.979868				#DIV/0!
																												Lower conf. limit	0.948043	0.956857				#DIV/0!
																												Upper conf. limit	0.988718	0.990665				#DIV/0!
																												Effective no. of trials	2	2				#DIV/0!
																												F	81.2945	98.346				#DIV/0!
																												Numerator DF	19	19				#DIV/0!
																												Denominator DF	19	19	0	0	0	#DIV/0!
																												F lower	37.4931	45.3573				#DIV/0!
																												F upper	176.267	213.239				#DIV/0!
																												Fisher r	2.20806	2.26387				2.23597
																												Fisher SE^-2	17	17
																												Pure variance	200.283	186.269				#DIV/0!
																												SE of pure variance	66.7854	61.8223				#DIV/0!
																												LCL	90.4303	84.5805				#DIV/0!
																												UCL	310.135	287.958				#DIV/0!

## Sheet: consecutive pairwise 1RM
	CONSECUTIVE PAIRWISE ANALYSIS OF TRIALS FOR RELIABILITY
	Hover cursor for citation:
	Hover cursor for updates:		2019	2018	2015	2012	2010	2009
	This spreadsheet calculates reliability statistics for consecutive pairs of trials and for the means of these statistics when there are >2 trials.
	For trials spaced at equal intervals, these means are better estimates of test-retest reliability than the more usual ANOVA-based reliablity statistics.
	But see the 1-way and 2-way spreadsheets in this workbook for such analyses.
	The reliability statistics are calculated for raw data and after log transformation.
	See the instructions in dark red to help you decide between which is better for your data.
	The data shown here are what you would expect for countermovement-jump height (best of three jumps) of team-sport athletes in trials separated by only a day or two.
	I generated the data by putting appropriate means and SD into the 2-way spreadsheet.
	Delete and replace the numbers in blue. Stats you might want are in red. Don't change any cells with a colored background.
	Missing values must be blanks or the graphs will display incorrectly. (The X values will plot as consecutive integers.)
	Clear all the "delete" and #NUM! corresponding to missing values. Restore the formula (by copying an adjacent cell) if you restore a missing value or for new data.
	Check the graphs (especially of the change scores) for outliers and non-uniformity of scatter. The log-transformed variables may show less non-uniformity.
	For more than 20 subjects, COPY any number of rows after the first data row and INSERT in the same place without deselecting.
	Do NOT copy and insert the first data row.											Use analysis of RAW data in one or more of the following situations:										Use LOG transformation in one or more of the following situations:
	Double-click on any of the red mean or SD cells to check that you have done this operation properly.											the data can be zero or negative;										the data can only be positive and non-zero;
	Colored boxes should enclose all rows of your data.											the data were measured from an arbitrary reference value;										the between-subject SD or change-score SD is more than ~20% of the mean;
	For less than 20 subjects, delete or clear any unwanted or empty rows.											the magnitude of the error is expected to be similar for all subjects.										the magnitude of the percent or factor error is expected to be similar for all subjects.
	To remove a trial, clear its data, or set the corrresponding "Include which trials?" cell to 0 or blank.
	For more than 6 trials, copy and insert the entire column(s) for Trials 5 and/or 6 and their change scores for the RAW and the LOG data.											Missing values produce delete in the panel of change scores.										Missing values produce #NUM! in the panel of log-transformed data.							Missing values produce delete in the panel of change scores.
	And follow the instructions in the cells indicated by "Hover cursor for >6 trials". If such editing is too difficult for you, contact me.											Clear delete from these cells to stop them plotting as zeros.										Clear #NUM! from these cells to get complete analyses.							Clear delete from these cells to stop them plotting as zeros.
												Copy-paste or drag a corner to restore formulae to those cells if you enter new data.										Copy-paste or drag a corner to restore formulae to those cells if you enter new data.							Copy-paste or -drag to restore formulae to those cells if you enter new data.
		Choose smallest effect:	0.2
		Choose conf. limits (%):	90			Hover cursor for >6 trials:	Read	me				Hover cursor for >6 trials:	Read me	Read	me	Do not							Hover cursor for >6 trials:	Read me	Read	me	Do not			Hover cursor for >6 trials:	Read me	Read	me	Do not
		RAW Data									Change scores of raw data					modify	Any				100*LOG-Transformed Data						modify		Change scores of Log-transformed data					modify	Any
		Trial:	1	2	3	4	5	6	Mean		2-1	3-2	4-3	5-4	6-5	this col.	subject?				1	2	3	4	5	6	this col.		2-1	3-2	4-3	5-4	6-5	this col.	subject?
		1	83.9988	86.1905	88.4811						2.19173	2.29061					1			1	443.08	445.656	448.279	#NUM!	#NUM!	#NUM!			2.57578	2.62291					#NUM!
		2	101.171	103.641	100.987						2.47035	-2.65464					1			2	461.681	464.094	461.499	#NUM!	#NUM!	#NUM!			2.41242	-2.59475					#NUM!
		3	71.055	73.6871	73.6588						2.63219	-0.0283186					1			3	426.345	429.983	429.944	#NUM!	#NUM!	#NUM!			3.63747	-0.0384383					#NUM!
		4	76.0215	78.6364	79.6994						2.61499	1.06294					1			4	433.102	436.484	437.826	#NUM!	#NUM!	#NUM!			3.38196	1.34266					#NUM!
		5	83.6073	83.7312	86.16						0.123913	2.42879					1			5	442.613	442.761	445.621	#NUM!	#NUM!	#NUM!			0.148099	2.85942					#NUM!
		6	65.9971	68.7739	71.2603						2.77682	2.4864					1			6	418.961	423.083	426.634	#NUM!	#NUM!	#NUM!			4.12138	3.55151					#NUM!
		7	56.3209	58.712	63.6591						2.39106	4.94715					1			7	403.107	407.264	415.354	#NUM!	#NUM!	#NUM!			4.15778	8.0899					#NUM!
		8	71.3544	73.7995	71.3767						2.4451	-2.42274					1			8	426.766	430.135	426.797	#NUM!	#NUM!	#NUM!			3.3693	-3.33796					#NUM!
		9	71.3544	73.7995	71.3767						2.4451	-2.42274					1			9	426.766	430.135	426.797	#NUM!	#NUM!	#NUM!			3.3693	-3.33796					#NUM!
		10	66.3232	61.3031	66.0461						-5.02013	4.74299					1			10	419.454	411.583	419.035	#NUM!	#NUM!	#NUM!			-7.87098	7.45225					#NUM!
		11	91.1686	94.7359	94.6953						3.5673	-0.0405972					1			11	451.271	455.109	455.066	#NUM!	#NUM!	#NUM!			3.83825	-0.0428622					#NUM!
		12	73.8129	73.8119	78.7862						-0.00100963	4.97437					1			12	430.153	430.152	436.674	#NUM!	#NUM!	#NUM!			-0.00136783	6.52189					#NUM!
		13	76.1752	81.1922	86.1951						5.01698	5.00291					1			13	433.304	439.682	445.661	#NUM!	#NUM!	#NUM!			6.3783	5.97942					#NUM!
		14	76.1752	78.7776	81.1836						2.60236	2.40605					1			14	433.304	436.663	439.671	#NUM!	#NUM!	#NUM!			3.35922	3.00852					#NUM!
		15	58.7341	58.764	61.2665						0.0298337	2.50252					1			15	407.302	407.353	411.523	#NUM!	#NUM!	#NUM!			0.0507815	4.17042					#NUM!
		16	81.1738	83.6534	81.0743						2.47961	-2.57917					1			16	439.659	442.668	439.537	#NUM!	#NUM!	#NUM!			3.00897	-3.13169					#NUM!
		17	68.6275	68.561	68.6005						-0.0665381	0.0394885					1			17	422.869	422.772	422.83	#NUM!	#NUM!	#NUM!			-0.0970025	0.0575796					#NUM!
		18	68.5773	66.0587	68.5859						-2.51862	2.52717					1			18	422.796	419.054	422.809	#NUM!	#NUM!	#NUM!			-3.74181	3.75428					#NUM!
		19	73.6041	73.6447	71.1019						0.0406156	-2.54273					1			19	429.87	429.925	426.411	#NUM!	#NUM!	#NUM!			0.055166	-3.51371					#NUM!
		20	76.1729	78.6167	76.2026						2.44379	-2.41404					1			20	433.301	436.458	433.34	#NUM!	#NUM!	#NUM!			3.15782	-3.11878					#NUM!
		21	61.0604	66.0747	66.1112						5.01431	0.0365341					1			21	411.186	419.079	419.134	#NUM!	#NUM!	#NUM!			7.89225	0.0552768					#NUM!
		Mean	73.9279	75.5317	76.5004				75.32	Mean of change	1.6038	0.968712				Mean	21			Mean	429.376	431.433	432.878				431.229	Mean	2.05729	1.44523					0
	2.10336	SD	10.5168	11.2325	10.4314				10.7329	SD of change	2.34032	2.75382				2.55545				SD	13.9218	14.5744	13.254				13.9272	SD	3.38543	3.78368				#DIV/0!
		Total no. of subjects	21	21	21	0	0	0	21	Total no. of subjects	21	21	0	0	0	21				N	21	21	21	0	0	0		N	21	21	0	0	0
		Include which trials?	1	1	1	1	0	0												Include which trials?	1	1	1	1	0	0
		DF	20	20	20	0	0	0	20											DF	20	20	20	0	0	0	Mean	Factor change in mean	1.02079	1.01456				Mean
																				Back-transformed mean	73.2411	74.7635	75.8519				74.6111	SD of change as a factor	1.03443	1.03856
																				SD as a ×/÷ factor	1.14937	1.1569	1.14173				1.14944	Change in mean (%)	2.0786	1.45573
	For your data, you may have to set max and min values of X and Y axes to appropriate values.																			SD as a CV (%)	14.9375	15.69	14.1725				14.9437	SD of change as CV (%)	3.44339	3.85618
									Measures of reliability via the RAW variable											Total no. of subjects	21	21	21	0	0	0		Total no. of subjects	21	21	0	0	0
									Raw	Trials	2-1	3-2	4-3	5-4	6-5	Mean											Measures of reliability via the LOG-TRANSFORMED variable
										Change in mean	1.6038	0.968712							Clear #NUM! and "delete" from the log-transformed cells to stop them plotting as zeros.								Factors	Trials	2-1	3-2	4-3	5-4	6-5	Mean
										Lower conf. limit	0.722986	-0.0677273							Restore the log-transformation formula to those cells if you enter new data.									Factor change in mean	1.02079	1.01456
										Upper conf. limit	2.48461	2.00515																Lower conf. limit	1.00786	1.00021
										Conf. limits as ±value	0.880812	1.03644																Upper conf. limit	1.03388	1.02911
										Typical error	1.65485	1.94724				1.80697												Conf. limits as ×/÷factor	1.01282	1.01434
										Lower conf. limit	1.3205	1.55381				1.50485												Factor typical error	1.02423	1.02712
										Upper conf. limit	2.24669	2.64365				2.29863												Lower conf. limit	1.01929	1.02158
										Conf. limits as approx. ×/÷factor	1.30438	1.30438				1.23591												Upper conf. limit	1.03303	1.03699
										Bias correction factor	1.0125	1.0125				1.00801												Conf. limits as approx. ×/÷factor	1.00672	1.00752
										Smallest effect from pure SD	2.15079	2.1326				2.11594												Bias correction factor	1.0003	1.00033
										Lower conf. limit	1.47086	1.45077				1.44249												Smallest effect from pure SD	1.0285	1.02772
										Upper conf. limit	2.6624	2.64409				2.62176												Lower conf. limit	1.01934	1.01872
										Smallest effect from observed SD	2.1761	2.16787				2.14658												Upper conf. limit	1.03543	1.03451
										Lower conf. limit	1.73643	1.72986				1.71287												Smallest effect from observed SD	1.02891	1.02825				1.02825
										Upper conf. limit	2.95436	2.94318				2.91428												Lower conf. limit	1.02301	1.02248
										Degrees of freedom	20	20	0	0	0	31.2												Upper conf. limit	1.03946	1.03855
									Standardized (when ICC>0)																			Degrees of freedom	20	20	0	0	0
										Change in mean	0.149136	0.090848															Percents
										Lower conf. limit	0.0672299	-0.00635162																Change in mean (%)	2.0786	1.45573
										Upper conf. limit	0.231042	0.188048																Lower conf. limit	0.78621	0.0211908
										Conf. limits as ±value	0.081906	0.0971996																Upper conf. limit	3.38756	2.91084
										Typical error	0.153883	0.182617				0.168358												Conf. limits as approx. ±value	1.30067	1.44482
										Lower conf. limit	0.122792	0.14572				0.140209												Typical error as a CV (%)	2.42274	2.71158
										Upper conf. limit	0.208918	0.247928				0.214166												Lower conf. limit	1.92855	2.15785
										Conf. limits as approx. ×/÷factor	1.30438	1.30438				1.23591												Upper conf. limit	3.30338	3.69909
										Bias correction factor	1.0125	1.0125				1.00801												Conf. limits as approx. ×/÷factor	1.30877	1.30929
									Correlations																			Bias correction factor	1.01265	1.01267
										Pearson correlation	0.980116	0.97195				0.976379												Smallest effect from pure SD	2.84972	2.77183
										Lower conf. limit	0.95732	0.940076																Lower conf. limit	1.93448	1.87227
										Upper conf. limit	0.990794	0.986984																Upper conf. limit	3.54265	3.45082
										Bias correction factor	1.00116	1.00162																Smallest effect from observed SD	2.89138	2.82515				2.8246
										Intraclass correlation (ICC)	0.979349	0.971141				0.974672												Lower conf. limit	2.30053	2.24798
										Lower conf. limit	0.956638	0.939678				0.952062												Upper conf. limit	3.94562	3.85479
										Upper conf. limit	0.990225	0.98631				0.987445											Standardized (when ICC>0)
										Effective no. of trials	2	2				2.56												Change in mean	0.146433	0.105719
										F	95.8495	68.3036				99.5151												Lower conf. limit	0.0557417	0.00154995
										Numerator DF	20	20				20												Upper conf. limit	0.237124	0.209888
										Denominator DF	20	20	0	0	0	31.2												Conf. limits as ±value	0.0906912	0.104169
										F lower	45.1236	32.1556				51.8426												Typical error	0.170389	0.19571
										F upper	203.599	145.087				202.35												Lower conf. limit	0.135963	0.156168
										Fisher r	2.3005	2.1264				2.21345												Upper conf. limit	0.231327	0.265704
										Fisher SE^-2	18	18																Conf. limits as approx. ×/÷factor	1.30438	1.30438
										Pure variance	115.647	113.7				111.93												Bias correction factor	1.0125	1.0125
										SE of pure variance	37.4268	37.1347				36.4233											Correlations
										LCL	54.0855	52.6185				52.0193												Pearson correlation	0.974256	0.969177
										UCL	177.209	174.781				171.841												Lower conf. limit	0.944929	0.934257
																												Upper conf. limit	0.988062	0.985686
																												Bias correction factor	1.00149	1.00178
																												Intraclass correlation	0.97479	0.966985
																												Lower conf. limit	0.947198	0.931149
																												Upper conf. limit	0.988052	0.98432
																											Measures of reliability of log-transformed variable
																													2-1	3-2	4-3	5-4	6-5	Mean
																												Change in mean	2.05729	1.44523
																												Lower conf. limit	0.783136	0.0211886
																												Upper conf. limit	3.33144	2.86928
																												Typical error	2.39386	2.67547				#DIV/0!
																												Lower conf. limit	1.91019	2.1349				#DIV/0!
																												Upper conf. limit	3.24999	3.63232				#DIV/0!
																												Bias correction factor	1.0125	1.0125
																												Smallest effect from pure SD	2.80987	2.73411				#DIV/0!
																												Lower conf. limit	1.916	1.85496				#DIV/0!
																												Upper conf. limit	3.48134	3.39261				#DIV/0!
																												Smallest effect from observed SD	2.85037	2.78598				2.78544
																												Lower conf. limit	2.27447	2.22308				#DIV/0!
																												Upper conf. limit	3.86977	3.78235				#DIV/0!
																												DF	20	20	0	0	0	#DIV/0!
																												Stdized change in mean	0.146433	0.105719
																												Lower conf. limit	0.0557417	0.00154995
																												Upper conf. limit	0.237124	0.209888
																												Stdized typical error	0.170389	0.19571
																												Lower conf. limit	0.135963	0.156168
																												Upper conf. limit	0.231327	0.265704
																												Pearson r	0.974256	0.969177				0.971829
																												Lower conf. limit	0.944929	0.934257
																												Upper conf. limit	0.988062	0.985686
																												Bias correction factor	1.00149	1.00178
																												Intraclass r	0.97479	0.966985				#DIV/0!
																												Lower conf. limit	0.947198	0.931149				#DIV/0!
																												Upper conf. limit	0.988052	0.98432				#DIV/0!
																												Effective no. of trials	2	2				#DIV/0!
																												F	78.3338	59.5789				#DIV/0!
																												Numerator DF	20	20				#DIV/0!
																												Denominator DF	20	20	0	0	0	#DIV/0!
																												F lower	36.8776	28.0483				#DIV/0!
																												F upper	166.393	126.555				#DIV/0!
																												Fisher r	2.16988	2.07856				2.12422
																												Fisher SE^-2	18	18
																												Pure variance	197.385	186.884				#DIV/0!
																												SE of pure variance	64.2052	61.3197				#DIV/0!
																												LCL	91.7768	86.0219				#DIV/0!
																												UCL	302.993	287.746				#DIV/0!

## Sheet: 1RM vs IMTP
	ANALYSIS OF VALIDITY BY LINEAR REGRESSION
			Hover cursor for citation:
			Hover cursor for updates:	2018	2017	2015	2012
	Data shown are body fat (%BM) for DEXA estimate (Y) vs Bod-Pod estimate (X), read from Fig. 1 of Sardinha et al., Am J Clin Nutr 68, 786-793, 1998.
	Replace the numbers in blue. Descriptive and validity stats are in red. The most important stats are in bold.
	You may change cells in plum (for smallest important difference), but remember to "control-z" or otherwise undo to restore the formulae in these cells.
	Always check your graphs for outliers or non-uniformity of error. The log-transformed variables may show less non-uniformity (but not for these data).
	Delete all rows with a missing value for either the criterion or the practical.
	For less than 58 pairs, delete or clear the unwanted rows.
	For more than 58 pairs, COPY and INSERT rows anywhere below the first row of data. Do NOT insert at the first row or you will corrupt the calculations.
	Double-click on any red cell to check that you have done this operation properly. Colored boxes should enclose all your data.
	(Check that you have generated predicteds and residuals for the new rows, and for the log-transformed data.)
	Don't touch any cells with a grey background, other than when you delete or copy-insert whole rows. These cells contain essential formulae.
	The PRRES error is an improved version of the obscure PRESS error. See the page on validity at newstats.org for more on this rare statistic.
			Raw data								100*Log-Transformed Data
			Y (criterion)	X (practical)		predicted	residual	prac-crit			Y (criterion)	X (practical)		predicted	residual	prac-crit
	Read me	1	3791.94	83.9988		3996.86	-204.92	-3707.94			824.063	443.08		829.477	-5.4133	-380.983
		2	4617.55	101.171		4694.07	-76.5234	-4516.38			843.762	461.681		846.473	-2.71055	-382.081
		3	3455.39	71.055		3471.32	-15.9349	-3384.34			814.769	426.345		814.186	0.583231	-388.424
		4	3017.1	76.0215		3672.97	-655.87	-2941.08			801.205	433.102		820.359	-19.1539	-368.104
		5	3290.5	83.6073		3980.96	-690.464	-3206.89			809.879	442.613		829.05	-19.1703	-367.266
		6	3278.72	65.9971		3265.97	12.7492	-3212.72			809.521	418.961		807.439	2.08205	-390.56
		7	2222.49	56.3209		2873.1	-650.615	-2166.17			770.638	403.107		792.952	-22.314	-367.532
		8	3535.69	71.3544		3483.48	52.2095	-3464.34			817.066	426.766		814.57	2.49636	-390.301
		9	3979.25	71.3544		3483.48	495.769	-3907.9			828.885	426.766		814.57	14.3148	-402.119
		10	3959.19	66.3232		3279.21	679.981	-3892.87			828.379	419.454		807.889	20.4904	-408.926
		11	4361.31	91.1686		4287.96	73.3499	-4270.14			838.053	451.271		836.961	1.09221	-386.782
		12	3261.47	73.8129		3583.3	-321.829	-3187.66			808.993	430.153		817.665	-8.67185	-378.84
		13	3618.43	76.1752		3679.21	-60.7824	-3542.25			819.38	433.304		820.544	-1.16406	-386.076
		14	4256.71	76.1752		3679.21	577.498	-4180.53			835.625	433.304		820.544	15.0816	-402.322
		15	2984.36	58.7341		2971.09	13.2749	-2925.63			800.114	407.302		796.786	3.32819	-392.812
		16	3528.24	81.1738		3882.16	-353.922	-3447.07			816.855	439.659		826.351	-9.4954	-377.196
		17	4055.94	68.6275		3372.77	683.173	-3987.31			830.794	422.869		811.01	19.784	-407.924
		18	2605.97	68.5773		3370.73	-764.761	-2537.39			786.556	422.796		810.943	-24.3869	-363.76
		19	4227.25	73.6041		3574.82	652.429	-4153.65			834.931	429.87		817.406	17.5244	-405.061
		20	2904.25	61.0604		3065.53	-161.282	-2843.19			797.393	411.186		800.335	-2.94182	-386.207
		21	3703.52	76.1729		3679.12	24.4013	-3627.35			821.704	433.301		820.541	1.16306	-388.403
		22	3709.67	73.4599		3568.97	140.7	-3636.21			821.87	429.674		817.227	4.64257	-392.196
		23	4534.45	83.6594		3983.08	551.369	-4450.79			841.946	442.675		829.107	12.8392	-399.27
		Mean	3604.32	74.3306				-3529.99		Mean	817.495	429.967				-97.9251
		SD	613.686	10.232				606.806		SD	18.0629	13.5601				14.106
		N	23	23						SX²		4045.27
		SX²		2303.26						Back-transformed mean	3550.87	73.6754
										SD as a CV (%)	19.7971	14.5225
										SD as a factor	1.19797	1.14522
										N	23	23
								Level for confidence limits (%):	90
		Measures of validity for RAW variables								Measures of validity for LOG-TRANSFORMED variables
	Calibration equation: Y = intercept + slope*X			Estimate	Lower CL	Upper CL	± CL	×/÷ CL	Calibration equation: Y = aX^b			Estimate	Lower CL	Upper CL	×/÷ CL	± CL
			intercept	586.41	-656.841	1829.66	1243.25				a	69.8472	14.5941	334.287	4.78597
			slope	40.6012	24.0248	57.1776	16.5764				b	0.913707	0.549739	1.27768	-	0.363969
			Enter an X value here:	10							Enter an X value here:	10
			Predicted (estimated) Y at X	992.422	-348.305	2333.15	1340.73				Predicted (estimated) Y at X	572.606	266.62	1229.76	2.14765
			Bias at X value	(for measures in the same units; see comment)							Bias at X value	(for measures in the same units; see comment)
			in raw units	-982.422	-2061.62	96.774	1079.2				as a factor	0.017464	0.00842889	0.0361841
			standardized	-1.60086	-3.3594	0.157693	1.75855				as a %	-98.2536	-99.1571	-96.3816	-	1.38776
											standardized	-22.4084	-26.4414	-18.3754	-	4.03299
			Overall bias	(for measures in the same units; see comment)							Overall bias	(for measures in the same units; see comment)
			Mean bias in raw units	-3529.99	-3747.26	-3312.72	217.267				Mean bias as a factor	0.375592	0.357093	0.395049
			Mean bias standardized	-5.75211	-6.10615	-5.39808	0.354035				Mean bias as a %	-62.4408	-64.2907	-60.4951	-	1.89779
			SD of bias in raw units	606.806	486.498	816.758	-	1.2957			Mean bias standardized	-5.42133	-5.70094	-5.14172	-	0.279614
			SD of bias standardized	0.988789	0.792748	1.33091	-	1.2957			SD of bias as a factor	1.15149	1.11974	1.20909
											SD of bias as a %	15.1494	11.9736	20.9088	1.32145
											SD of bias standardized	0.780936	0.626104	1.05114	1.2957
			Smallest important difference		Lower	Upper	approx.	×/÷			Smallest important difference		Lower	Upper
			in Y, standardized	0.2	CL	CL	±CL	CL			in Y, standardized	0.2	CL	CL		approx.
			equivalent in raw units of Y	122.737	98.4028	165.204	-	1.2957			equivalent in Y as a factor	1.03679	1.02939	1.04983		±CL
			or enter a smallest delta Y								equivalent in Y as a %	3.67863	2.93869	4.98268	-	1.022
			equivalent in X, raw units	3.023	1.721	6.87639	2.57769				or enter a smallest delta Y as a factor
											or enter a smallest delta Y as a %
											equivalent in X as a factor	1.04033	1.02293	1.09248
											equivalent in X as a %	4.03297	2.29277	9.24813	-	3.47768
					Lower	Upper		×/÷					Lower	Upper	×/÷
			Typical error of estimate	Estimate	CL	CL		CL			Typical error of estimate	Estimate	CL	CL	CL
			in raw units	462.324	370.661	622.285	-	1.2957			as a ×/÷ factor	1.144	1.11389	1.19851
			standardized	1.08729	0.669488	2.12052	-	1.77971			as a CV (%)	14.4	11.389	19.8508	1.32022
											standardized	1.06084	0.656144	2.03997	1.76324
					Lower	Upper	approx.						Lower	Upper		approx.
				Estimate	CL	CL	±CL					Estimate	CL	CL		±CL
			Pearson correlation	0.676944	0.426533	0.830967	0.202217				Pearson correlation	0.685932	0.440162	0.836088	-	0.197963
			Bland-Altman	Estimate							Bland-Altman	Estimate
			± 95% limits of agreement	1189.34							95% limits of agreement (×/÷ factor)	1.31848

## Sheet: 5RM vs IMTP
	ANALYSIS OF VALIDITY BY LINEAR REGRESSION
			Hover cursor for citation:
			Hover cursor for updates:	2018	2017	2015	2012
	Data shown are body fat (%BM) for DEXA estimate (Y) vs Bod-Pod estimate (X), read from Fig. 1 of Sardinha et al., Am J Clin Nutr 68, 786-793, 1998.
	Replace the numbers in blue. Descriptive and validity stats are in red. The most important stats are in bold.
	You may change cells in plum (for smallest important difference), but remember to "control-z" or otherwise undo to restore the formulae in these cells.
	Always check your graphs for outliers or non-uniformity of error. The log-transformed variables may show less non-uniformity (but not for these data).
	Delete all rows with a missing value for either the criterion or the practical.
	For less than 58 pairs, delete or clear the unwanted rows.
	For more than 58 pairs, COPY and INSERT rows anywhere below the first row of data. Do NOT insert at the first row or you will corrupt the calculations.
	Double-click on any red cell to check that you have done this operation properly. Colored boxes should enclose all your data.
	(Check that you have generated predicteds and residuals for the new rows, and for the log-transformed data.)
	Don't touch any cells with a grey background, other than when you delete or copy-insert whole rows. These cells contain essential formulae.
	The PRRES error is an improved version of the obscure PRESS error. See the page on validity at newstats.org for more on this rare statistic.
			Raw data								100*Log-Transformed Data
			Y (criterion)	X (practical)		predicted	residual	prac-crit			Y (criterion)	X (practical)		predicted	residual	prac-crit
	Read me	1	3791.94	76.2273		3988.28	-196.343	-3715.71			824.063	433.372		828.867	-4.80375	-390.691
		2	4617.55	90.9987		4662.93	-45.3813	-4526.55			843.762	451.085		844.676	-0.913831	-392.677
		3	3455.39	63.4708		3405.66	49.7272	-3391.92			814.769	415.058		812.522	2.24743	-399.711
		4	3017.1	65.8751		3515.47	-498.37	-2951.22			801.205	418.776		815.84	-14.6348	-382.429
		5	3290.5	76.1382		3984.21	-693.712	-3214.36			809.879	433.255		828.763	-18.8832	-376.625
		6	3278.72	55.952		3062.26	216.46	-3222.77			809.521	402.449		801.268	8.25255	-407.071
		7	2222.49	53.6169		2955.61	-733.121	-2168.87			770.638	398.187		797.464	-26.8252	-372.452
		8	3535.69	65.5		3498.34	37.3497	-3470.19			817.066	418.205		815.33	1.73602	-398.861
		9	3979.25	66.2948		3534.64	444.609	-3912.96			828.885	419.411		816.407	12.478	-409.474
		10	3959.19	58.7953		3192.12	767.071	-3900.39			828.379	407.406		805.692	22.6872	-420.973
		11	4361.31	83.6771		4328.53	32.7771	-4277.63			838.053	442.696		837.189	0.863439	-395.356
		12	3261.47	66.2331		3531.82	-270.351	-3195.24			808.993	419.318		816.324	-7.33036	-389.675
		13	3618.43	73.8109		3877.92	-259.492	-3544.62			819.38	430.151		825.992	-6.61249	-389.229
		14	4256.71	73.8109		3877.92	378.788	-4182.9			835.625	430.151		825.992	9.63314	-405.474
		15	2984.36	48.6786		2730.06	254.298	-2935.68			800.114	388.524		788.84	11.2746	-411.59
		16	3528.24	71.3582		3765.9	-237.657	-3456.88			816.855	426.771		822.976	-6.12032	-390.084
		17	4055.94	63.7198		3417.04	638.904	-3992.22			830.794	415.45		812.871	17.9227	-415.344
		18	2605.97	61.0779		3296.37	-690.403	-2544.89			786.556	411.215		809.092	-22.5357	-375.341
		19	4227.25	66.0984		3525.67	701.578	-4161.15			834.931	419.114		816.142	18.7886	-415.816
		20	2904.25	58.5393		3180.43	-276.176	-2845.71			797.393	406.97		805.303	-7.9097	-390.423
		21	3703.52	68.6225		3640.95	62.5679	-3634.9			821.704	422.862		819.487	2.2171	-398.842
		22	3709.67	65.9091		3517.02	192.647	-3643.76			821.87	418.828		815.886	5.9838	-403.042
		23	4534.45	81.1744		4214.23	320.222	-4453.28			841.946	439.66		834.479	7.46673	-402.286
		24	2415.62	46.0851		2611.61	-195.993	-2369.53			778.971	383.049		783.953	-4.982	-395.922
		Mean	3554.79	66.736				-3488.06		Mean	815.89	418.832				-98.1138
		SD	647.388	10.6616				639.407		SD	19.337	16.2161				13.8165
		N	24	24						SX²		6048.12
		SX²		2614.42						Back-transformed mean	3494.33	65.9118
										SD as a CV (%)	21.3332	17.6049
										SD as a factor	1.21333	1.17605
										N	24	24
								Level for confidence limits (%):	90
		Measures of validity for RAW variables								Measures of validity for LOG-TRANSFORMED variables
	Calibration equation: Y = intercept + slope*X			Estimate	Lower CL	Upper CL	± CL	×/÷ CL	Calibration equation: Y = aX^b			Estimate	Lower CL	Upper CL	×/÷ CL	± CL
			intercept	506.79	-482.701	1496.28	989.491				a	83.16	24.7129	279.837	3.36504
			slope	45.6725	31.0237	60.3214	14.6489				b	0.892514	0.603001	1.18203	-	0.289512
			Enter an X value here:	10							Enter an X value here:	10
			Predicted (estimated) Y at X	963.515	-165.715	2092.75	1129.23				Predicted (estimated) Y at X	649.274	359.071	1174.02	1.8082
			Bias at X value	(for measures in the same units; see comment)							Bias at X value	(for measures in the same units; see comment)
			in raw units	-953.515	-1798.58	-108.45	845.065				as a factor	0.0154018	0.00890499	0.0266385
			standardized	-1.47286	-2.77821	-0.16752	1.30534				as a %	-98.4598	-99.1095	-97.3361	-	0.886677
											standardized	-21.5818	-24.415	-18.7485	-	2.83329
			Overall bias	(for measures in the same units; see comment)							Overall bias	(for measures in the same units; see comment)
			Mean bias in raw units	-3488.06	-3711.75	-3264.36	223.692				Mean bias as a factor	0.374884	0.357195	0.39345
			Mean bias standardized	-5.38789	-5.73342	-5.04236	0.34553				Mean bias as a %	-62.5116	-64.2805	-60.655	-	1.81275
			SD of bias in raw units	639.407	514.912	853.82	-	1.28771			Mean bias standardized	-5.07388	-5.32385	-4.82391	-	0.249966
			SD of bias standardized	0.987672	0.795368	1.31887	-	1.28771			SD of bias as a factor	1.14817	1.11769	1.20261
											SD of bias as a %	14.8165	11.769	20.2612	1.31209
											SD of bias standardized	0.71451	0.575392	0.954107	1.28771
			Smallest important difference		Lower	Upper	approx.	×/÷			Smallest important difference		Lower	Upper
			in Y, standardized	0.2	CL	CL	±CL	CL			in Y, standardized	0.2	CL	CL		approx.
			equivalent in raw units of Y	129.478	104.268	172.895	-	1.28771			equivalent in Y as a factor	1.03943	1.03163	1.053		±CL
			or enter a smallest delta Y								equivalent in Y as a %	3.94316	3.16341	5.29994	-	1.06827
			equivalent in X, raw units	2.83491	1.72854	5.57302	1.92224				or enter a smallest delta Y as a factor
											or enter a smallest delta Y as a %
											equivalent in X as a factor	1.04428	1.0267	1.08942
											equivalent in X as a %	4.42841	2.66982	8.94169	-	3.13594
					Lower	Upper		×/÷					Lower	Upper	×/÷
			Typical error of estimate	Estimate	CL	CL		CL			Typical error of estimate	Estimate	CL	CL	CL
			in raw units	436.199	351.269	582.47	-	1.28771			as a ×/÷ factor	1.14011	1.11137	1.19135
			standardized	0.8761	0.564269	1.5168	-	1.63954			as a CV (%)	14.0105	11.1367	19.1352	1.31081
											standardized	0.886047	0.56979	1.54046	1.64425
					Lower	Upper	approx.						Lower	Upper		approx.
				Estimate	CL	CL	±CL					Estimate	CL	CL		±CL
			Pearson correlation	0.752167	0.550424	0.870916	0.160246				Pearson correlation	0.748465	0.544492	0.868856	-	0.162182
			Bland-Altman	Estimate							Bland-Altman	Estimate
			± 95% limits of agreement	1253.24							95% limits of agreement (×/÷ factor)	1.31102

## Sheet: Female Results
Results		Kettlebell Mass (kg)
	Peak force IMTP (N)	1RM			5RM
Participant		Session 1 (kg)	Session 2 (kg)	Session 3 (kg)	Session 1 (kg)	Session 2 (kg)	Session 3 (kg)
1	1921.96	43.4742	43.5072	45.9929	38.6018	41.01	41.05
2	1981.94	41.083	41.0939	41.1227	36.0322	36.1291	38.6031
3	2302.61	41.2498	43.5513		41.1678

## Sheet: Kettlebell COM
	Kettlebell COM (cm)
	1RM			5RM
Participant	Session 1	Session 2	Session 3	Session 1	Session 2	Session 3
1	22.7003	23.0175	23.3273	21.7795	22.0808	22.3944
2	24.4307	24.6206	24.4307	23.6475	23.6475	23.6475
3	21.1745	21.4702	21.4702	20.2845	21.1745	20.8706
4	21.7795	22.0808	22.2086	20.5817	21.1745	21.1745
5	22.7003	22.7003	23.0175	21.7795	22.0808	21.7795
6	20.5817	20.8706	21.1745	19.4459	20.2845	20.5817
7	19.4459	19.7155	20.2845	19.1684	19.4459	19.7155
8	21.1745	21.4702	21.4702	20.5817	20.8706	20.5817
9	21.1745	21.4702	21.4702	20.5817	20.8706	21.3045
10	20.5817	20.0041	20.5817
11	23.6475	23.5932	23.5932	22.7003	23.3273	23.3273
12	21.4702	21.4702	22.2086	20.5817	21.1745	21.1745
13	21.7795	22.3944	23.0175	21.4702	21.7795	21.7795
14	21.7795	22.0808	22.3944	21.4702	21.7795	21.4702
15	19.7155	19.7155	20.0041	19.7155	20.0041	20.0041
16	22.3944	22.7003	22.3944	21.1745	21.7795	21.7795
17	20.8706	20.8706	20.8706	20.2845	20.5817	20.2845
18	20.8706	20.5817	20.8706	20.0041	20.2845	20.5817
19	21.4702	21.4702	21.1745	20.5817	20.5817	20.5817
20	20.0041	20.5817	20.5817	19.7155	20.0041	19.7155
21	21.7795	22.0808	21.7795	20.8706	20.8706	20.8706
